# Supplementary material for: Facile pyrolysis approach of folic acid-derived high graphite N-doped porous carbon materials for the oxygen reduction reaction
Source: Royal Society of Chemistry journal article supplement (doi:10.1039/d0nj06174c), 2021-01-01
Supplement: d0nj06174c1.pdf [file d0nj06174c1.pdf]

Facile pyrolysis approach of folic acid-derived high graphite N-doped porous carbon materials for the oxygen reduction reaction

Xuexia Liu<sup>a, b</sup>, Shuaihui Li<sup>b</sup>, Limin Liu<sup>b</sup>, Zhijun Wang<sup>b, \*</sup>

<sup>a</sup> College of Chemistry, Nanchang University, Nanchang, Jiangxi 330088, China

<sup>b</sup> School of chemistry and Chemical Engineering, Jinggangshan University, Ji'an, Jiangxi 343009, China

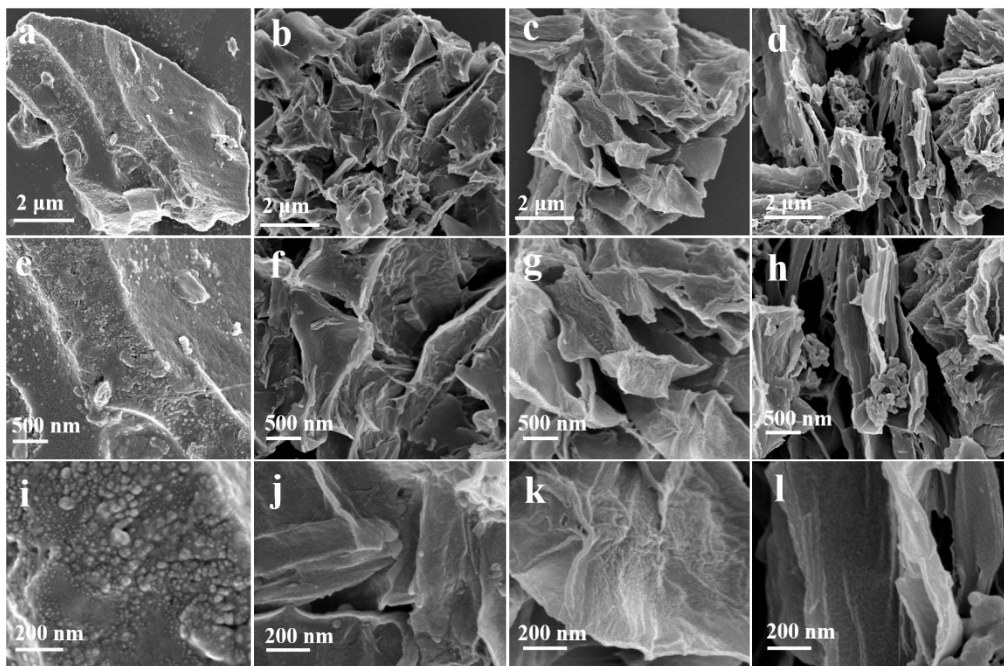

**Fig. S1** Scanning electron microscopy (SEM) images of (a, e and i) dC-750, (b, f and j) m-NC-650, (c, g and k) m-NC-850 and (d, h and l) m-NC-950.

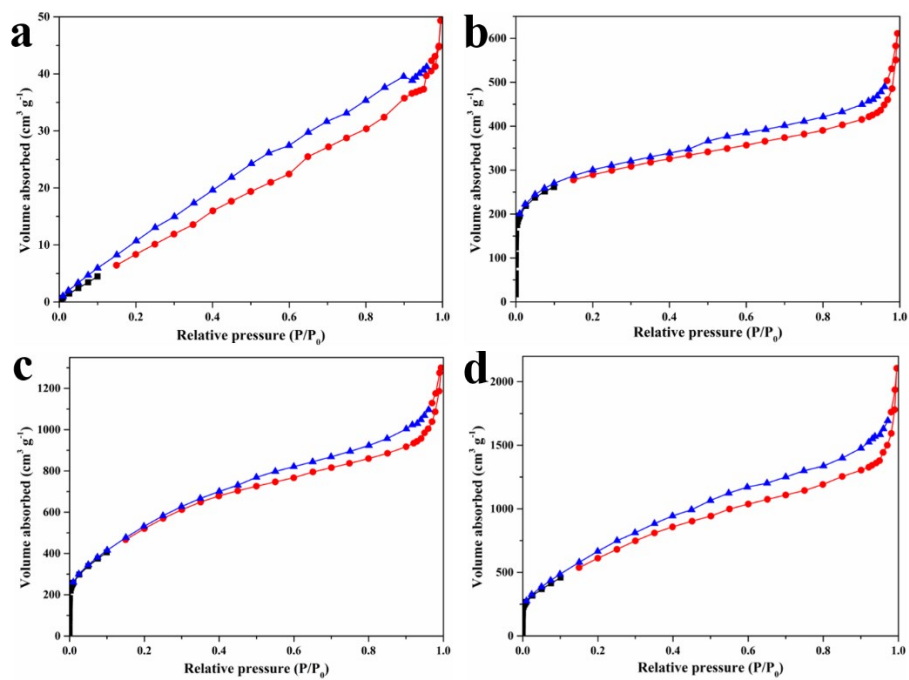

**Fig. S2** Nitrogen adsorption/desorption isotherms of (a) dC-750, (b) m-NC-650, (c) m-NC-850 and (d) m-NC-950.

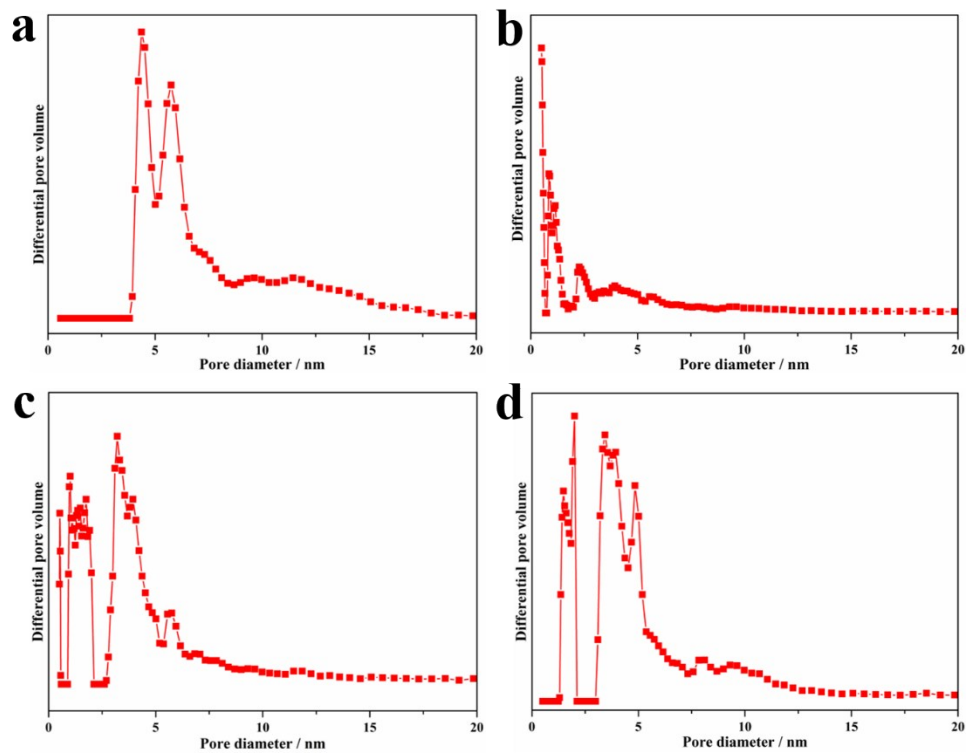

**Fig. S3** Pore-size distribution curves of (a) dC-750, (b) m-NC-650, (c) m-NC-850 and (d) m-NC-950.

**Table S1** Pore characteristics of dC-750 and m-NC-T.

| Sample   | $S_{\text{BET}}$<br>( $\text{m}^2 \text{g}^{-1}$ ) | $S_{\text{langmuir}}$<br>( $\text{m}^2 \text{g}^{-1}$ ) | $S_{\text{mic}}$<br>( $\text{m}^2 \text{g}^{-1}$ ) | $S_{\text{mes}}$<br>( $\text{m}^2 \text{g}^{-1}$ ) | $V_{\text{pore}}$<br>( $\text{m}^3 \text{g}^{-1}$ ) | $D_{\text{aver}}$<br>(nm) |
|----------|----------------------------------------------------|---------------------------------------------------------|----------------------------------------------------|----------------------------------------------------|-----------------------------------------------------|---------------------------|
| dC-750   | 58.36                                              | 253.40                                                  | 0.00                                               | 58.36                                              | 0.059                                               | 4.367                     |
| m-NC-650 | 1044.01                                            | 1429.62                                                 | 658.76                                             | 385.25                                             | 0.672                                               | 0.504                     |
| m-NC-750 | 1441.08                                            | 2213.75                                                 | 652.27                                             | 788.81                                             | 1.024                                               | 0.524                     |
| m-NC-850 | 1955.80                                            | 3228.70                                                 | 448.75                                             | 1507.05                                            | 1.522                                               | 3.204                     |
| m-NC-950 | 2378.79                                            | 4180.74                                                 | 0.00                                               | 2378.79                                            | 2.207                                               | 2.000                     |

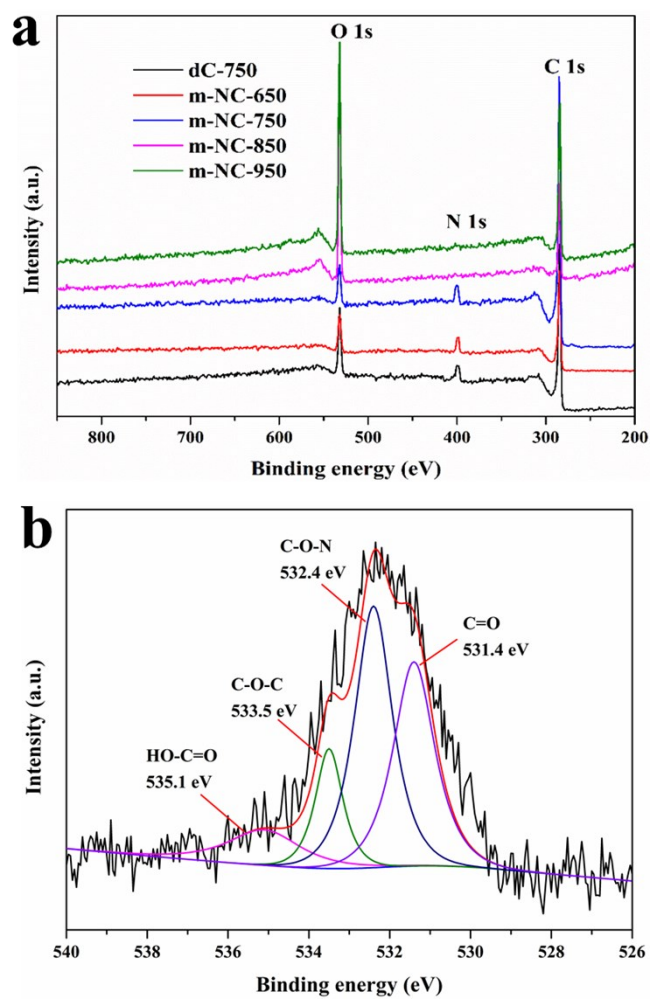

**Fig. S4** (a) XPS survey spectra of as-prepared materials. (b) O 1s spectra of m-NC-750.

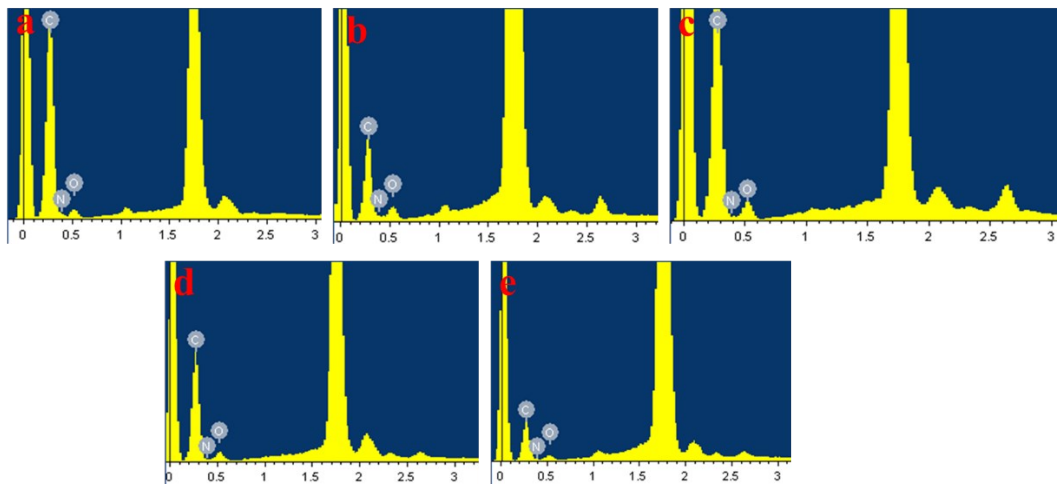

**Fig. S5** EDX spectrum of (a) dC-750, (b) m-NC-650, (c) m-NC-750, (d) m-NC-850 and (e) m-NC-950.

Table S2 The relative atomic ratios of the different types of N.

| Sample   | Graphitic N<br>(atomic%) | Pyrrolic N<br>(atomic%) | Pyridinic N<br>(atomic%) |
|----------|--------------------------|-------------------------|--------------------------|
| dC-750   | 1.21                     | 1.05                    | 2.41                     |
| m-NC-650 | 1.27                     | 2.85                    | 3.55                     |
| m-NC-750 | 3.92                     | 3.33                    | 4.14                     |
| m-NC-850 | -                        | -                       | -                        |
| m-NC-950 | -                        | -                       | -                        |



**Table S3** On-set and half-wave potential for Pt/C, dC-750 and m-NC-T at 1600 rpm in 0.1 M KOH.

| Sample   | $E_{1/2}$ (V <sub>RHE</sub> ) | $E_0$ (V <sub>RHE</sub> ) |
|----------|-------------------------------|---------------------------|
| Pt/C     | 0.81                          | 0.95                      |
| dC-750   | 0.53                          | 0.66                      |
| m-NC-650 | 0.79                          | 0.95                      |
| m-NC-750 | 0.82                          | 0.96                      |
| m-NC-850 | 0.82                          | 0.95                      |
| m-NC-950 | 0.78                          | 0.91                      |

**Table S4** Comparison of the ORR performances for various N-doped carbon catalysts at 1600 rpm in 0.1 M KOH.

| Catalyst                                               | $E_{1/2}$ (V <sub>RHE</sub> ) | $E_0$ (V <sub>RHE</sub> ) | References       |
|--------------------------------------------------------|-------------------------------|---------------------------|------------------|
| m-NC-750                                               | 0.82                          | 0.96                      | <b>This work</b> |
| PHNG-800                                               | 0.81                          | 0.94                      | [1]              |
| N <sub>0.54</sub> -Z <sub>3</sub> /M <sub>1</sub> -900 | 0.824                         | 0.94                      | [2]              |
| NPC                                                    | 0.86                          | 0.94                      | [3]              |
| Polymer-modified                                       | 0.7                           | 0.87                      | [4]              |
| FC-NH <sub>4</sub> Cl-800-1                            | 0.85                          | 0.94                      | [5]              |
| Cu@NC-700                                              | 0.86                          | 0.926                     | [6]              |
| Cu <sub>3</sub> P@NPPC-650                             | 0.78                          | 0.85                      | [7]              |
| PFeC-900                                               | 0.71                          | 0.95                      | [8]              |
| NCNT 4                                                 | 0.78                          | 0.96                      | [9]              |
| N-doped porous Carbon nanosheets                       | 0.77                          | 0.90                      | [10]             |
| Porous carbon Nanofiber                                | 0.79                          | 0.88                      | [11]             |
| N-Doped graphene                                       | 0.84                          | 0.92                      | [12]             |
| NPCN-900                                               | 0.78                          | 0.92                      | [13]             |

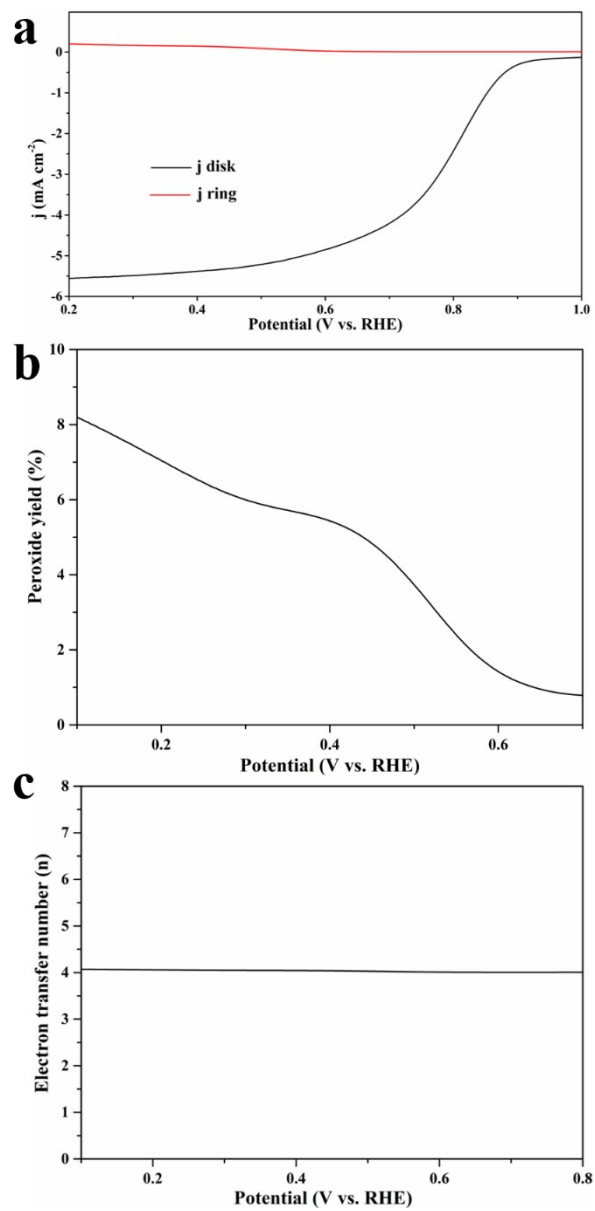

**Fig. S6** (a) RRDE voltammogram curve of m-NC-750 at 1600 rpm. (b) Peroxide yield and (c) electron transfer numbers for m-NC-750.

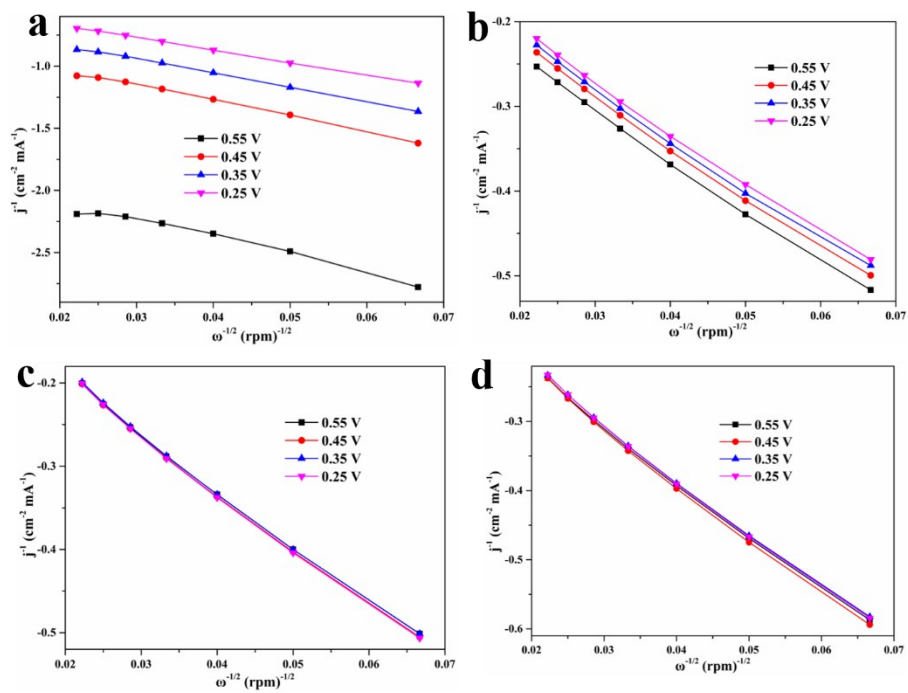

**Fig. S7** The Koutecky-Levich (K-L) plots of (a) dC-750, (b) m-NC-650, (c) m-NC-850 and (e) m-NC-950.

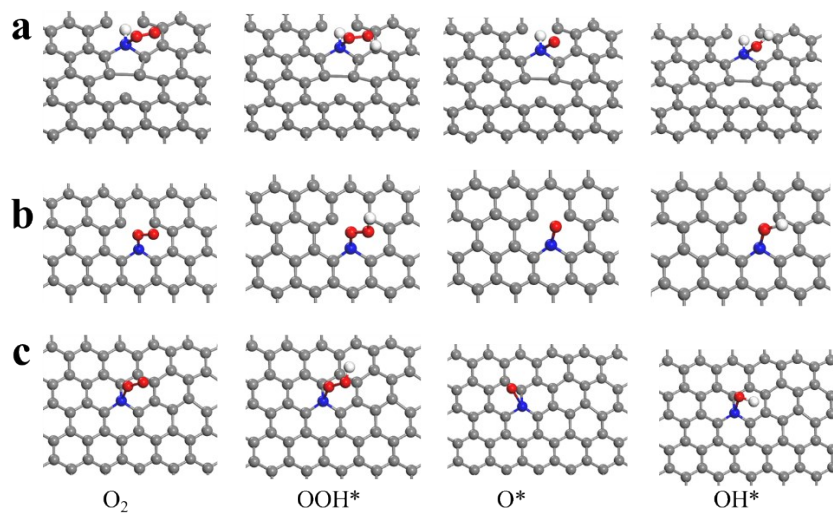

**Fig. S8** Optimized atomic structures for  $O_2$ ,  $OOH^*$ ,  $O^*$  and  $OH^*$  intermediates absorbed on (a) pyridinic N, (b) pyrrolic N and (c) graphite N dopant carbon hybrid models of electrocatalytic ORR. Colour code: Gray, blue and red balls represent C, N and O atoms, respectively.

## References

- [1] L. Qin, R. M. Ding, H. X. Wang, J. H. Wu, C. H. Wang, C. H. Zhang, Y. Xu, L. C. Wang, B. L. Lv, *Nano Research*, 2017, **10**, 305-319.
- [2] X. G. Li, B. Y. Guan, S. Y. Gao, X. W. Lou, *Energy Environ. Sci.*, 2019, **12**, 648-655.
- [3] H. Han, Y. Noh, Y. Kim, W. S. Jung, S. Park, W. B. Kim, *Nanoscale*, 2019, **11**, 2423-2433.
- [4] Y. H. Yu, Z. P. Zhang, L. M. Dai, F. Wang, *Chem. Eur. J.*, 2019, **25**, 5652-5657.
- [5] J. Y. Zhu, D. Xu, C. C. Wang, W. J. Qian, J. Guo, F. Yan, *Carbon*, 2017, **115**, 1-10.
- [6] X. D. Wen, H. Qi, Y. Cheng, Q. Q. Zhang, C. M. Hou, J. Q. Guan, *Chin. J. Chem.*, 2020, **38**, 941-946.
- [7] R. Wang, X. Y. Dong, J. Du, J. Y. Zhao, S. Q. Zang, *Adv. Mater.*, 2018, **30**, 1703711.
- [8] N. Norouzi, F. A. Choudhury, H. M. El-Kaderi, *ACS Appl. Energy Mater.*, 2020, **3**, 2537-2546.
- [9] Z. Y. Xu, Z. Y. Zhou, B. Y. Li, G. F. Wang, P. W. Leu, *J. Phys. Chem. C*, 2020, **124**, 8689-8696.
- [10] H. J. Yu, L. Shang, T. Bian, R. Shi, G. I. N. Waterhouse, Y. F. Zhao, C. Zhou, L. Z. Wu, C. H. Tung, T. Zhang, *Adv. Mater.*, 2016, **28**, 5080-5086.
- [11] W. Zhang, Z. Y. Wu, H. L. Jiang, S. H. Yu, *J. Am. Chem. Soc.*, 2014, **136**, 14385-14388.
- [12] H. B. Yang, J. W. Miao, S. F. Hung, J. A. Chen, H. B. Tao, X. Z. Wang, L. P. Zhang, R. Chen, J. J. Gao, H. M. Chen, L. M. Dai, B. Liu, *Sci. Adv.*, 2016, **2**, e1501122.
- [13] H. Jiang, Y. Q. Wang, J. Y. Hao, Y. S. Liu, W. Z. Li, J. Li, *Carbon*, 2017, **122**, 64-73.
